# Supplementary material for: Deposition of Coating to Protect Waste Water Reservoir in Acidic Solution by Arc Thermal Spray Process
Source: Hindawi journal article supplement (doi:10.1155/2018/4050175), 2018-01-01
Supplement: f1 [file 4050175.f1.docx]

Deposition of coating to protect waste water reservoir in acidic solution by arc thermal spray process

Han-Seung Lee1, Jin-ho Park1, Jitendra Kumar Singh1, * and M. A. Ismail2

1 Department of Architectural Engineering, Hanyang University, 1271 Sa 3-dong, Sangrok-gu, Ansan 15588 (Korea); ercleehs@hanyang.ac.kr (H.S.L.), jinho9422@naver.com (J.H.P.)

2 Department of Civil and Construction Engineering, Faculty of Engineering and Science, Curtin University Malaysia, CDT 250, 98009 Miri, Sarawak (Malaysia); m.abdelkader@curtin.edu.my (M.A.I)

***** Correspondence should be addressed to Jitendra Kumar Singh; [jk200386@hanyang.ac.kr](mailto:jk200386@hanyang.ac.kr)

FIGURE S1: Nyquist plots (at higher frequency ranges) of SS plate and sprayed coatings in pH 4 solution after 1 h of exposure (100 kHz to 40 kHz).

**(a)**

**(b)**

FIGURE S2: Kramers-Kronig transformation of the EIS data obtained for SS plate and sprayed coatings in pH 4 solution after (a) 1 h and (b) 312 h (100 kHz to 0.01 Hz).
